# Supplementary material for: Volunteer Activities among Medical Students in Syria: A Cross-Sectional Study
Source: Research Square preprint supplement (doi:10.21203/rs.3.rs-6854027/v1), 2025-09-18
Supplement: Supplementary file 1 [file 53433c945da4a0bf7cff2df7.docx]

Questionnaire for research

“Volunteer Activities among Medical Students in Syria:

A Cross-Sectional Study**”**

**Informed consent:**

We are conducting a cross-sectional study to assess volunteer activities among medical students in Syria, aiming to understand the current state of volunteering, its impact on participants, and the factors influencing it. This research is of significant importance in understanding students better and creating a suitable environment in which to harness their potential. Participants will be asked to complete this questionnaire with general information about themselves and their various volunteer activities, if any, without requesting their name, phone number, or email address. Moreover**, all provided information will be treated with complete confidentiality**.

Consent to participate in the study:

Yes, I agree to participate.

No, I do not agree to participate.

**First section: Sociodemographic Information:**

Mark the appropriate response:

1. Your gender:

Male.
Female.

1. Your Place of residence is:

Urban

Rural

1. Your financial status:
   Below average.
   Average.
   Good.
   Excellent.
2. Do you have work for financial compensation?
   Yes.
   No.
3. What is your university type?
   Public.
   Private.
4. What was your academic year in the Educational year 2021-2022?
    First year.
   Second year.
   Third year.
   Fourth year.
   Fifth year.
   Sixth year.
5. Your faculty:
   Medicine.
   Dentistry.
   Pharmacy.
   Health Sciences.
6. Rating of your grades:
   Fair.

Good.

V. good.

Excellent.

Honor.

**Second section: Students' involvement in various types of volunteer activities.**

Mark the appropriate response:

1. Presence of a volunteering brother or friend.

Yes

No

1. Student's engagement in volunteer activities.

Yes

No.

1. Types of volunteer activities.
   Scientific academic volunteer activities.
   Non-medical community activities.
   Medical educational activities in the community (e.g., lectures on diseases and prevention).
   Medical media activities (e.g., raising medical awareness on social media platforms).
   Medical activities during crises (e.g., the COVID-19 pandemic and the 2023 Syrian-Turkish earthquake).
   Medical service activities in the community (e.g., clinics).

**Third section: Participants' Views on the Benefits of Volunteer Activities for Volunteers:**

Mark the appropriate response:

| **Statement** | **Strongly disagree** | **Disagree** | **Neutral** | **Agree** | **Strongly agree** |
| --- | --- | --- | --- | --- | --- |
| Effective communication with a broad audience |  |  |  |  |  |
| Effectively expressing my ideas in writing |  |  |  |  |  |
| Effectively expressing my ideas in oral communication |  |  |  |  |  |
| Enhancing my resume |  |  |  |  |  |
| Increasing my opportunities for study abroad compared to those without volunteer activities. |  |  |  |  |  |

**Thank you very much for your participation**
